# Supplementary material
Source: MDPI journal article supplement (https://www.mdpi.com/2073-4344/9/12/1012)
Supplement: s1 [file s1]

# Supplementary material

Article

## Lipase catalysed acidolysis for efficient synthesis of phospholipids enriched with isomerically pure *cis*-9,*trans*-11 and *trans*-10,*cis*-12 conjugated linoleic acid.

Natalia Niezgoda<sup>1,\*</sup>, Anna Gliszczynska<sup>1,\*</sup>

<sup>1</sup> Department of Chemistry, Wrocław University of Environmental and Life Sciences, Norwida 25, 50-375 Wrocław, Poland; natalia.niezgoda@upwr.edu.pl

\* Correspondence: [natalia.niezgoda@upwr.edu.pl](mailto:natalia.niezgoda@upwr.edu.pl) (N.N.); [anna.gliszczynska@upwr.edu.pl](mailto:anna.gliszczynska@upwr.edu.pl) (A.G.)

### Calibration curves for quantification of phospholipid product of the acidolysis reaction

The quantities of PLs were evaluated based on the CAD response which was fitted to the quadratic model. The equations of calibration curves for L- $\alpha$ -phosphatidylcholine ( $\geq 99\%$ ), L- $\alpha$ -lysophosphatidylcholine ( $\geq 99\%$ ) from egg yolk, 1,2-dipalmitoyl-*sn*-glycero-3-phosphocholine and (PC<sub>diPA</sub>) 1-palmitoyl-2-hydroxy-*sn*-glycero-3-phosphocholine (LPC<sub>PA</sub>) were as follows:

$$\text{Egg yolk PC (M}_w \text{ 777 g/mol):} \quad y = -9.772x^2 + 74.684x, R^2 = 0.999, \quad (1)$$

$$\text{Egg yolk LPC (M}_w \text{ 508 g/mol):} \quad y = -7.335x^2 + 59.207x, R^2 = 0.998, \quad (2)$$

$$\text{PC}_{\text{diPA}} \text{ (M}_w \text{ 734 g/mol):} \quad y = -5.082x^2 + 54.102x, R^2 = 0.998, \quad (3)$$

$$\text{LPC}_{\text{PA}} \text{ (M}_w \text{ 496 g/mol):} \quad y = -8.879x^2 + 23.324x, R^2 = 0.996, \quad (4)$$

The calibration curves for incorporation degree of CLA into PC and LPC were determined for 1,2-di(conjugated)linoleoyl-*sn*-glycero-3-phosphocholine (PC<sub>diCLA</sub>) and 1-(conjugated)linoleoyl-2-hydroxy-*sn*-glycero-3-phosphocholine (LPC<sub>CLA</sub>) on photodiode array detector at 235 nm. Response of the detection method was fitted to the linear model:

$$\text{PC}_{\text{diCLA}} \text{ (M}_w \text{ 782 g/mol):} \quad y = 17.411x, R^2 = 0.949, \quad (5)$$

$$\text{LPC}_{\text{CLA}} \text{ (M}_w \text{ 520 g/mol):} \quad y = 5.073x, R^2 = 0.997, \quad (6)$$
